1       **Title: *In situ* architecture of the algal nuclear pore complex**

2

3       **Authors:** Shyamal Mosalaganti<sup>1,#</sup>, Jan Kosinski<sup>1,#</sup>, Sahradha Albert<sup>2,#</sup>, Miroslava  
4       Schaffer<sup>2,#</sup>, Jürgen M. Plitzko<sup>2</sup>, Wolfgang Baumeister<sup>2\*</sup>, Benjamin D. Engel<sup>2\*</sup>,  
5       Martin Beck<sup>1,3\*</sup>

6

7       **Affiliations:**

8       <sup>1</sup>Structural and Computational Biology Unit, European Molecular Biology  
9       Laboratory, 69117 Heidelberg, Germany.

10      <sup>2</sup>Department of Molecular Structural Biology, Max Planck Institute of  
11      Biochemistry, 82152 Martinsried, Germany.

12      <sup>3</sup>Cell Biology and Biophysics Unit, European Molecular Biology Laboratory,  
13      69117 Heidelberg, Germany.

14

15      # contributed equally

16

17      \*Correspondence to: baumeist@biochem.mpg.de, engelben@biochem.mpg.de,  
18      martin.beck@embl.de

19

20

## 21 **Abstract**

22

23 Nuclear pore complexes (NPCs) span the nuclear envelope and mediate  
24 nucleocytoplasmic exchange. They are a hallmark of eukaryotes and are deeply  
25 rooted in the evolutionary origin of cellular compartmentalization. NPCs have an  
26 elaborate architecture that has been well studied in vertebrates. Whether this  
27 architecture is unique or varies significantly in other eukaryotic kingdoms  
28 remains unknown, predominantly due to missing *in situ* structural data. Here, we  
29 report the architecture of the algal NPC from the early branching eukaryote  
30 *Chlamydomonas reinhardtii* and compare it to the human NPC. We find that the  
31 inner ring of the *Chlamydomonas* NPC has an unexpectedly large diameter, and  
32 the outer rings exhibit an asymmetric oligomeric state that is unprecedented  
33 compared to all previously proposed models of NPC architecture. Our study  
34 provides evidence that the NPC is subject to substantial structural variation  
35 between species. The divergent and conserved features of NPC architecture  
36 provide insights into the evolution of the nucleocytoplasmic transport machinery.

37

38

## 39 **Introduction**

40

41 Nuclear pore complexes (NPCs) mediate molecular traffic between the  
42 cytoplasm and nucleus, and are therefore indispensable for eukaryotic life. NPCs  
43 are built from ~30 nucleoporins (Nups) that are mostly conserved across  
44 eukaryotes, with some exceptions<sup>1-3</sup>. Nups are organized into various  
45 subcomplexes, which assemble together to form two outer rings that reside in  
46 the cytoplasm and nucleus, and an inner ring that fuses the inner and outer  
47 nuclear membranes. In the human NPC (*HsNPC*), the ten-membered Y-complex is  
48 a major component of the outer rings (also referred to as the cytoplasmic and  
49 nuclear rings). 32 copies of the Y-complex arrange in a head-to-tail conformation  
50 to form concentric, reticulated rings within both the cytoplasmic and nuclear  
51 rings<sup>4</sup>. The Y-complex scaffold is complemented by additional subcomplexes that  
52 fulfill specific functions in the nuclear and cytoplasmic periphery and provide the  
53 directionality cue for nucleocytoplasmic exchange. The inner ring is composed of  
54 32 protomers, each containing the Nup93 and Nup62 subcomplexes. Although  
55 the inner ring is constructed from proteins different than the outer rings, the  
56 oligomeric assembly of the inner and outer rings is similar<sup>5,6</sup>.

57

58 This architectural model of the human NPC is based on *in situ* cryo-electron  
59 tomography (cryo-ET) and subtomogram averaging of NPCs imaged within  
60 isolated HeLa cell nuclear envelopes. Similar structural analysis is also available  
61 for intact HeLa cells<sup>7</sup>, u2os cells<sup>8</sup> and *Xenopus laevis* nuclear envelopes<sup>9</sup>. Analyses  
62 of the *Dictyostelium discoideum*<sup>10</sup> and *Saccharomyces cerevisiae*<sup>11</sup> NPCs lacked the  
63 necessary resolution to visualize subcomplex architecture. Various biochemical  
64 and structural studies of NPC subcomplexes from vertebrates, fungi and  
65 Trypanosomes have concluded that the subcomplexes are conserved (for a  
66 comprehensive review see<sup>12</sup>). However, it remains unclear whether  
67 subcomplexes from different species assemble into NPCs in an identical fashion.  
68 This is highlighted by a prominent model proposed for yeast NPC architecture  
69 that suggests that yeast have fewer Y-complexes than humans<sup>3</sup>. Thus, the

70 number of Y-complexes and oligomeric state of the NPC across eukaryotic  
71 kingdoms remains uncertain.

72

73 An important architectural feature underlying all previously proposed models of  
74 NPC architecture is the intrinsic C2 symmetry of the inner ring and Y-complexes  
75 across the plane of the nuclear envelope<sup>1,3,12</sup>. It has been proposed that the NPC's  
76 remarkable degree of symmetry might be essential to facilitate the modular  
77 assembly of its large macromolecular structure from a limited set of building  
78 blocks<sup>13</sup>. Here, we combine focused ion beam thinning of vitreous frozen cells<sup>14-</sup>  
79 <sup>16</sup> with *in situ* cryo-ET to analyze NPC architecture within the native cellular  
80 environment of *Chlamydomonas reinhardtii*, a unicellular green alga  
81 (Chlorophyte) and an early branching eukaryote. This approach facilitates  
82 structural analysis within intact cells in a close-to-live state without the need for  
83 subcellular fractionation or affinity purification. We find that the *C. reinhardtii*  
84 NPC (CrNPC) has several distinct architectural features, including an  
85 asymmetrical oligomeric state of the cytoplasmic and nuclear rings. We conclude  
86 that different mechanisms of Y-complex oligomerization have evolved  
87 independently for the *C. reinhardtii* cytoplasmic and nuclear rings, and that NPC  
88 architecture may vary considerably throughout eukaryotic life.

89

90

## 91 **Results**

92

93 *Key scaffolding subcomplexes are conserved in C. reinhardtii*

94

95 *C. reinhardtii* cells are particularly well suited for *in situ* structural biology,  
96 enabling high-resolution imaging of cellular structures<sup>17-21</sup>. This model organism  
97 is therefore an excellent candidate to address the question of how well current  
98 models of NPC architecture are transferable across eukaryotic species. We first  
99 explored the genome of *C. reinhardtii*<sup>22</sup> by sequence alignments to determine  
100 whether the key Nups of the NPC are detectable in the genome and whether the  
101 Nup subcomplexes are conserved. In agreement with a previous genomics  
102 study<sup>23</sup>, we found homologs of all major scaffold and FG-Nups (Supplementary  
103 Fig. 1, Table 1). *NUP188* gene, which was previously reported to be absent in  
104 plants<sup>24,25</sup>, was present in the *C. reinhardtii* genome. We also detected a *NUP188*  
105 homolog in the genome of *Arabidopsis thaliana*, emphasizing that Nup188  
106 protein has a conserved role in the NPC scaffold architecture and is likely an  
107 ancient protein. Although sequence similarity cannot prove that an individual  
108 gene indeed encodes a functional equivalent of another gene, it is fair to conclude  
109 that the inner ring and Y-complexes are generally conserved in *C. reinhardtii*  
110 because all components that have been functionally analyzed in various species<sup>12</sup>  
111 were confidently detected.

112

113 However, we did not detect *NUP358* and *NUP153* genes, which in metazoa  
114 constitute cytoplasmic ring and nuclear ring-specific elements, respectively. The  
115 Y-complex member, *NUP37*, and the transmembrane Nups, *GP210* and *POM121*,  
116 are also absent from the genome, whereas the chromatin-binding Nup, Elys, is  
117 encoded in a truncated form. Failure to detect these genes might be due to low  
118 sequence similarity or insufficient sequencing coverage of the genome. However,

119 in the case of Nup358, it has been well established that this protein has evolved  
120 in animals and is absent from fungi and plants<sup>26</sup>.

121

122 *The algal NPC has an unprecedented architecture*

123

124 To analyze the *in situ* NPC architecture of *C. reinhardtii*, we acquired tomograms  
125 of the nuclear envelope within its native cellular environment (Supplementary  
126 Fig. 2b) and extracted 78 subtomograms containing individual *CrNPCs*. We used  
127 subtomogram averaging to produce structural maps of the cytoplasmic, inner  
128 and nuclear rings at an overall resolution of ~3 nm (Supplementary Fig. 2a,c)<sup>17</sup>.

129

130 Comparison of the *CrNPC* to the *HsNPC* revealed striking differences in their  
131 overall dimensions and architecture (Fig. 1a). In humans, the outer rings are  
132 oriented in an upright position and are spatially separated from the inner ring by  
133 a connector element (magenta arrowheads, Fig. 1a)<sup>27</sup>. In *C. reinhardtii*, however,  
134 the outer rings are flatter and are directly stacked onto the inner ring. This direct  
135 engagement of inner and outer rings enforces a compact conformation of the  
136 *CrNPC*; the *CrNPC* scaffold extends only ~60 nm along the nucleocytoplasmic  
137 axis, whereas the human NPC spans ~80 nm. While the outer diameters of the  
138 *HsNPC* and the *CrNPC* along the plane of the nuclear envelope are similar, the  
139 inner diameter of the *CrNPC* central channel is approximately 21 nm wider than  
140 that of the *HsNPC* (Fig. 1b), suggestive of a modified inner ring arrangement.  
141 Lastly, the *CrNPC*'s cytoplasmic ring has considerably less density than the  
142 nuclear ring. Such extensive asymmetric density across the nuclear envelope  
143 plane is surprising and has not been previously reported for NPCs in any other  
144 organism (Fig. 1c). Although the cytoplasmic ring contains less density overall, it  
145 has distinct features within densities protruding towards the central channel  
146 (black arrowheads, Fig. 1c).

147

148 *The algal inner ring is dilated but its basic organizational principles are conserved*

149

150 We next assessed whether the architectural arrangement of scaffolding Nup  
151 subcomplexes that we previously assigned into the *HsNPC*<sup>4,5</sup> can explain the  
152 density observed for the subtomogram average of the *CrNPC*. To this end, we  
153 used a hierarchical procedure that included an unbiased fitting of low-pass  
154 filtered structural models of human Y-complexes and inner ring protomers,  
155 filtering the fits using objective criteria (not clashing with each other and having  
156 at least 60% overlap with the map of the *CrNPC*), and local re-adjustment of the  
157 selected fits to account for conformational differences between the *CrNPC* and  
158 *HsNPC* (Materials and Methods and Supplementary Fig. 3). The resulting density  
159 assignment reveals that the *CrNPC* map can be well explained by the structural  
160 repertoire of human scaffolding Nups (Supplementary Figs. 4 and 5).

161

162 The 32 C2-symmetric protomers assigned into the *HsNPC* inner ring<sup>5,6</sup> not only  
163 fit the inner ring of the *CrNPC* but also have an identical relative arrangement to  
164 that in the *HsNPC* (Fig. 2a, Supplementary Fig. 4). The entire asymmetric unit,  
165 consisting of four C2-symmetric protomers, fits into the *CrNPC* with high  
166 statistical significance (Supplementary Fig. 4a-c). Three out of four inner ring  
167 protomers were statistically significant after correction for multiple comparisons

168 as assessed by systematic fitting; the one remaining protomer was recovered by  
169 subsequent filtering (Supplementary Fig. 4d-f). The identified density is weaker  
170 in the regions of the two inner protomers corresponding to the Nup62  
171 subcomplex (Supplementary Fig. 4), leaving the exact number of Nup62 per  
172 asymmetric unit uncertain.

173

174 The four stacked protomers within the asymmetric units of the inner ring  
175 (traditionally termed spokes) are arranged with respect to each other in a  
176 similar fashion to the *HsNPC* (Fig. 2a). However, the eight spokes of the *CrNPC*  
177 are positioned in a wider arrangement, leading to an apparent dilation and wider  
178 central channel diameter (Fig. 2b). The tight interconnection between spokes  
179 observed in the *HsNPC* is therefore relaxed in the *CrNPC*, leading to gaps  
180 between the spokes that correspond to larger peripheral channels (black  
181 arrowheads, Fig. 2b). We conclude that although the principle composition and  
182 architecture of the inner ring within each asymmetric unit is conserved between  
183 these two distantly related eukaryotes, the overall spacing of the spokes is  
184 strikingly different.

185

186 *The cytoplasmic ring of the algal NPC has a simplified oligomeric state compared*  
187 *to the human NPC*

188

189 We next examined the outer rings in detail. In humans, it has been established  
190 that the Y-complexes account for the majority of the observed outer ring density.  
191 In both the cytoplasmic and nuclear rings of the *HsNPC*, 16 Y-complexes  
192 oligomerize in head-to-tail fashion to form reticulated double concentric rings<sup>4</sup>  
193 (Fig. 3a). We identified Y-complexes at the expected positions in the *CrNPC* map  
194 (Fig. 3a) using exhaustive fitting of low-pass-filtered human models, albeit with  
195 lower scores compared to the inner ring fitting, i.e. the assignments do not rise to  
196 statistical significance during the exhaustive fitting but are identified by the  
197 subsequent filtering step (Supplementary Figs. 3 and 5). This may be attributed  
198 to the hinges within the Y-complexes<sup>28</sup>, which appear to adopt a different  
199 conformation in the *CrNPC*. However, the characteristic Y-complex shape is  
200 obvious in the map of the *CrNPC* (Fig. 3a, Supplementary Fig. 5, Video 1). In both  
201 the cytoplasmic and nuclear rings of the *CrNPC*, the Y-complexes are tilted down  
202 towards the dilated inner ring, resulting in flatter outer ring architecture than in  
203 the *HsNPC*.

204

205 We found that two key features of outer ring architecture are missing from the  
206 *CrNPC*. First, the cytoplasmic ring contains only eight Y-complexes, half the  
207 number found in the *HsNPC*. The Y-complex duplication is missing from the  
208 *CrNPC* cytoplasmic ring. This explains why the cytoplasmic ring has less density  
209 than the nuclear ring, which contains 16 Y-complexes that are in rotational  
210 register with the 16 Y-complexes of the *HsNPC*. *C. reinhardtii* thus has a total of  
211 only 24 Y-complexes, which are asymmetrically distributed across the nuclear  
212 envelope plane (16 in the nuclear ring, 8 in the cytoplasmic ring), in contrast to  
213 any previously proposed model of NPC scaffold architecture (Fig. 3, Video 1).  
214 This oligomeric state is consistent with the finding that metazoan-specific  
215 Nup358, which is required for linking the inner and outer Y-complexes of the  
216 cytoplasmic ring in humans<sup>27</sup>, is absent in algae (Supplementary Fig. 6).

217

218 Second, the connector density attributed to *HsNup155* in the *HsNPC*<sup>27</sup> is missing  
219 from the cytoplasmic but not the nuclear side the *CrNPC* (Fig. 3b). This is  
220 surprising because this connector is the only rigid structural element that  
221 connects the inner ring to the outer rings in the *HsNPC*. We therefore inspected  
222 the contact points between the inner and cytoplasmic rings of the *CrNPC*. We  
223 found that contact is made by densities attributed to large scaffold Nups  
224 (Nup188 or Nup205) in the cytoplasmic ring of the *HsNPC* (Fig. 3). We conclude  
225 that although the *C. reinhardtii* Y-complexes of the cytoplasmic ring arrange in a  
226 head-to-tail fashion similarly to humans, neither the oligomeric state nor the  
227 connection to the inner ring is conserved between the alga and humans.

228

229 *Subcomplexes of the cytoplasmic filaments differ between the algal and human*  
230 *NPCs*

231

232 The Nup214 subcomplex (Nup159 subcomplex in fungi) is a key player in the  
233 remodeling and export of messenger ribonucleoprotein particles<sup>1</sup>. It is a major  
234 component of the cytoplasmic filaments that decorate the NPC scaffold at the  
235 cytoplasmic ring. In both the *CrNPC* and *HsNPC*, we observed characteristic  
236 densities extending from the cytoplasmic ring towards the central channel.  
237 However, the two densities are considerably different. The density protruding  
238 from the *C. reinhardtii* cytoplasmic ring is relatively large (black arrowheads, Fig.  
239 1c) and would be consistent with previous analysis based on subtomogram  
240 averaging and cross-linking mass spectrometry that has associated the Nup159  
241 subcomplex with the small arm of the Y-complex<sup>4,29,30</sup>. The corresponding  
242 density protruding from the human cytoplasmic ring is smaller (green  
243 arrowheads, Fig. 1c). This is may be due to flexibility or different subcomplex  
244 oligomeric state, emphasizing species-specific differences of this rather poorly  
245 conserved NPC module. At the given resolution, neither the algal nor the human  
246 NPC density map can accommodate the dimeric yeast Nup159 subcomplex<sup>29,30</sup>.  
247 Taken together, this analysis suggests that not only the Y-complexes but also  
248 more peripheral subcomplexes are subject to extensive variation across the tree  
249 of life.

250

251

## 252 Discussion

253

254 The evolution of the NPC is deeply rooted with the origin of eukaryotes. The  
255 protocoatamer hypothesis suggests that NPCs and trafficking vesicles arose from  
256 a common ancestor by divergent evolution<sup>31</sup>. Understanding the evolution of the  
257 NPC is therefore pivotal for addressing the origin of eukaryotic  
258 compartmentalization. Although most Nups were postulated to be ancient  
259 proteins<sup>23</sup>, it remains unclear to what extent the organizational principles of the  
260 NPC are preserved in subsequent eukaryotic lineages. Here, by comparing NPCs  
261 of species from two distant eukaryotic kingdoms, we find that the oligomeric  
262 state of the NPC can be vary substantially.

263

264 Our findings are derived from the *CrNPC* structure obtained by *in situ* cryo-ET.  
265 Analysis of the *C. reinhardtii* genome reveals that this alga has orthologs of all

266 necessary protein constituents of the major Nup scaffolding subcomplexes  
267 known from other species, and our systematic fitting analysis of the *Cr*NPC  
268 supports this conclusion. While we cannot exclude that the compositional  
269 variability of the *Cr*NPC extends even further (e.g. through unidentified Nups  
270 specific to algae or Nup paralogs not yet included in the current genomic  
271 sequence), the assignment at the level of subcomplexes already reveals striking  
272 features.

273  
274 In particular, the density map reveals that the *Cr*NPC contains a high degree of  
275 asymmetric density, with a total of only 24 Y-complexes, highlighting the  
276 importance of asymmetric linker Nups that are required to connect scaffold  
277 Nups<sup>32</sup>. Interestingly, a recent biochemical and morphological study of the  
278 Trypanosome NPC suggested that its NPC structure may be highly symmetric<sup>12</sup>.  
279 Although one might hypothesize that only 16 Y-complexes were present in the  
280 outer rings of ancient NPCs, with a similar stoichiometry as proposed for the  
281 yeast NPC<sup>33</sup>, it remains unclear if the oligomeric state of the *Cr*NPC arose due to a  
282 loss or a gain of function. Since a highly similar mode of nuclear Y-complex  
283 duplication is found in algae (*C. reinhardtii*) and vertebrates (humans), we  
284 consider it likely that vertebrates have duplicated their cytoplasmic Y-complexes  
285 using protein-protein interfaces that had already evolved for the nuclear ring,  
286 but using the metazoan-specific Nup358 as a dimerizer<sup>27</sup>. Such oligomeric  
287 duplication events are frequently observed during the evolution of protein  
288 complexes<sup>34</sup>.

289  
290 The inner ring of the *Cr*NPC map is dilated in comparison to the *Hs*NPC map. The  
291 *Cr*NPC inner ring has the same diameter as the outer rings, which are  
292 horizontally stacked upon it. The inner ring's rotationally symmetric spokes are  
293 distantly spaced, thereby forming relatively large peripheral channels that have  
294 been proposed to accommodate inner nuclear membrane protein import<sup>35</sup>. In  
295 this conformation, the head-to-tail connection of the outer ring Y-complexes  
296 might be important for restricting the maximal dilation of the pores. Are these  
297 species-specific differences, or could they be related to the NPC's functional  
298 state? Independent cryo-ET structural analysis suggests that such elaborate  
299 conformational changes might also occur in vertebrates<sup>36</sup>. Constricted inner ring  
300 conformations have been observed not only in isolated *X. laevis* and HeLa cell  
301 nuclear envelopes but also within intact u2os cells<sup>8</sup>, while more dilated  
302 conformations were observed within intact HeLa cells<sup>7</sup>. Taken together with our  
303 data from intact *C. reinhardtii* cells, these findings suggest that both constricted  
304 and dilated conformations have physiological relevance. We speculate that not  
305 only the FG-rich regions, but also the scaffold of the NPC may be much more  
306 dynamic than anticipated. Previous studies have reported the dilation of isolated  
307 *X. laevis* NPCs upon treatment with chemicals such as *trans*-cyclohexane-1,2-diol  
308 and steroids<sup>37,38</sup>. Using atomic force microscopy, these studies found that the  
309 NPC central channel diameter can expand up to 63 nm, the same diameter that  
310 we observed in *C. reinhardtii*. How such massive conformational changes are  
311 structurally induced and potentially regulated, awaits further analysis. The local  
312 FG-Nup concentration within the central channel might change during inner ring  
313 dilation. It remains to be determined whether inner ring dilation has any effect  
314 on nucleocytoplasmic transport activity, such as the rates and size limits of the

315 transiting substrates, or whether it is relevant for inner nuclear membrane  
316 protein import.

317

318 Using *in situ* cryo-ET enabled by cryo-FIB milling, we were able to identify major  
319 structural variations within the NPC. Our study therefore underscores the  
320 importance of structural analysis within the native cellular environments of  
321 divergent species to understand the breadth of NPC architecture and ultimately  
322 gain insights into both NPC function and evolution.



## 323 **Materials and Methods**

324

### 325 Cryo-ET

326 Cells were prepared for data acquisition based on procedures described in  
327 *Schaffer, M. et al.*<sup>39</sup>. Briefly, cells were blotted onto EM grids, which were plunge-  
328 frozen into a liquid ethane/propane mixture using a Vitrobot mark IV (FEI) and  
329 then transferred onto a cryo stage in a Scios (FEI) or Quanta (FEI) FIB/SEM  
330 microscope. Cells were thinned with a gallium ion beam and transferred into a  
331 Titan Krios transmission electron microscope (FEI) equipped with a K2 Summit  
332 camera (Gatan) for tomogram acquisition, as described in *Albert, S. et al.*<sup>17</sup>.

333

### 334 CrNPC structure determination

335 Tomogram reconstruction and subtomogram averaging of the CrNPC is  
336 described in an accompanying study<sup>17</sup>. Briefly, 78 NPCs were picked from twice-  
337 binned tomograms. Particles were manually aligned for correct orientation of the  
338 cytoplasmic and the nuclear rings of NPCs. Initial average of the whole NPC was  
339 calculated, using PyTom<sup>40</sup>, by imposing eight-fold symmetry. The eight  
340 asymmetric units of the individual aligned NPCs were extracted, yielding 624  
341 asymmetric units. Alignment and averaging of these asymmetric units were  
342 carried out using the AV3/TOM packages as described<sup>41</sup>. After few iterations on  
343 the level of asymmetric units, masks specific to the cytoplasmic, nuclear and the  
344 inner ring of asymmetric unit were used to further align each of those parts  
345 respectively (as reported in<sup>4</sup>).

346

### 347 Identification of *C. reinhardtii* Nups

348 The *C. reinhardtii* Nups were identified by retrieving predicted Nup sequences  
349 from the Phytozome platform<sup>42</sup> based on annotations or by BLAST<sup>43</sup> searches  
350 against the database of predicted *C. reinhardtii* proteins and the genomic  
351 sequence at Phytozome using human and plant Nups as queries. All  
352 identifications were confirmed using reverse BLAST searches (using the  
353 predicted Nups as queries) searches against a non-redundant protein database  
354 and by domain mapping using the HHpred server<sup>44</sup> to ensure that the identified  
355 genes are bona fide Nup orthologs rather than more remote homologs from  
356 other families (e.g. vesicle coat proteins).

357

### 358 Assignment of subcomplexes within the CrNPC map

359 To assign densities of the CrNPC map to specific subcomplexes, a hierarchical  
360 fitting procedure (Supplementary Fig. 3) was applied as follows:

361

362 **i) Unbiased global fitting.** An unbiased global fitting approach was performed  
363 using structural models of various human subcomplexes derived from  
364 previously published structures<sup>5,27</sup>. The Y-complex was complemented with an  
365 additional Nup96 C-terminal region model based on the yeast Y-complex crystal  
366 structure (PDB ID: 4XMM)<sup>45</sup>. Because of the lower resolution of the CrNPC map,  
367 all models were low-pass filtered to 30 Å. The resulting model maps were then  
368 independently fitted into the CrNPC cryo-EM density using global fitting as  
369 implemented in UCSF Chimera<sup>46</sup>. All fitting runs were performed using 1,000,000  
370 random initial placements, correlation about the mean as a fitting metric, and  
371 requiring at least 30% of the model map to be covered by the CrNPC density

372 envelope defined at low threshold. For each fitted model, this yielded 5,000-  
373 25,000 fits after clustering.

374

375 **ii) Assignment of statistically significant fits.** For each fitting run, the  
376 statistical significance of the fits was calculated as described previously<sup>4,27</sup>. All  
377 non-redundant statistically significant fits were placed in the model, leading to  
378 assignment of three copies of the inner ring subcomplexes. These three fits  
379 reproduced the arrangement observed in the inner ring of the *HsNPC*,  
380 reinforcing the confidence in the fits.

381

382 **ii) Assignment of the remaining densities by filtering top scoring non-  
383 overlapping fits.** To assign the remaining densities, for each fitting run of the  
384 inner ring protomers and outer ring Y-complexes, the top ten fits were selected  
385 and filtered according to following criteria: 1) overlap with the *CrNPC* map was  
386 at least 60%, 2) the fits did not clash with the statistically significant fits already  
387 placed within the map, 3) the fits did not significantly overlap with the  
388 membrane density. This procedure led to a single solution of non-clashing fits  
389 including four copies of the protomer in the inner ring and three copies of the Y-  
390 complex in the outer rings (two in the nuclear ring and one in the cytoplasmic  
391 ring). All fits reproduced an overall arrangement that resembled the *HsNPC*,  
392 increasing the confidence in the fits.

393

394 **iv) Tentative assignment of Nup188/205 and the Nup155 connector.**  
395 Analysis of the difference density between the resulting model and the *CrNPC*  
396 map revealed characteristic unassigned densities on the nuclear side of the  
397 *CrNPC* that matched the positions of Nup188/205 and the connector Nup155 in  
398 the *HsNPC*. Based on both the shape and positional similarity, these densities  
399 were tentatively assigned as Nup188/205 and Nup155. Because the shape of  
400 Nup188 and Nup205 crystal structure is similar at 30 Å resolution, the densities  
401 could not be unambiguously assigned to one of the two Nups.

402

403 **v) Optimization of the fits.** Visual inspection of the fits indicated  
404 conformational differences between the fitted human subcomplexes and *CrNPC*  
405 densities, especially in the stem region of the Y-complex. Therefore, the fits were  
406 optimized by local re-fitting of individual subunits or domains. It must be noted  
407 that due to the lower resolution of the *CrNPC* map, the final fits should not be  
408 interpreted at atomic resolution; the flexible fitting merely aids in the  
409 assignment of densities and segmentations. Finally, Nup37 and the Elys β-  
410 propeller, which lacked corresponding densities in the *CrNPC* map and were not  
411 identified in the *C. reinhardtii* genome, were removed from the Y-complex fits.

412

413 In addition to the above procedure, several validation runs were performed  
414 using the entire inner ring asymmetric unit (which led to a statistically  
415 significant hit, Supplementary Fig.4).

416

417

## 418 **Acknowledgments**

419 We thank Drs. Felix Willmund and Jacob Musser for advice. Christian Zimmerli,  
420 Marc Wehmer, Drs. Elizabeth Villa, Eri Sakata and Matteo Allegretti are

421 acknowledged for help with the preparation of this manuscript. S.M. and J.K.  
422 were supported by the EMBL Interdisciplinary Postdoc Programme under Marie  
423 Curie COFUND Actions. W.B. acknowledges funding from the Max Planck Society  
424 and Deutsche Forschungsgemeinschaft excellence clusters CIPSM and SFB 1035.  
425 M.B. acknowledges funding by EMBL and the European Research Council  
426 (309271-NPCAtlas).

427

#### 428 **Author contributions**

429 FIB milling: MS; cryo-ET: MS, BE, SA; structural analysis: SM, SA; structural  
430 modeling: SM, JK; bioinformatic analysis: JK; project management: JP, WB, BE,  
431 MB; paper writing: SM, JK, WB, BE, MB.

432

#### 433 **Data availability**

434 Cryo-EM maps of the *C. reinhardtii* cytoplasmic, inner and nuclear rings will be  
435 deposited into the EMDB. The cryo-EM map of the human inner ring has been  
436 previously published (EMD-8087).

437

#### 438 **Competing financial interests**

439 The authors declare no competing financial interests.

440

441

442

443 **References**

- 444 1 Beck, M. & Hurt, E. The nuclear pore complex: understanding its function  
445 through structural insight. *Nature reviews. Molecular cell biology* **18**, 73-  
446 89, doi:10.1038/nrm.2016.147 (2017).
- 447 2 Knockenhauer, K. E. & Schwartz, T. U. The Nuclear Pore Complex as a  
448 Flexible and Dynamic Gate. *Cell* **164**, 1162-1171,  
449 doi:10.1016/j.cell.2016.01.034 (2016).
- 450 3 Hoelz, A., Debler, E. W. & Blobel, G. The Structure of the Nuclear Pore  
451 Complex. *Annu Rev Biochem* **80**, 613-643, doi:Doi 10.1146/Annurev-  
452 Biochem-060109-151030 (2011).
- 453 4 Bui, K. H. *et al.* Integrated structural analysis of the human nuclear pore  
454 complex scaffold. *Cell* **155**, 1233-1243, doi:10.1016/j.cell.2013.10.055  
455 (2013).
- 456 5 Kosinski, J. *et al.* Molecular architecture of the inner ring scaffold of the  
457 human nuclear pore complex. *Science* **352**, 363-365,  
458 doi:10.1126/science.aaf0643 (2016).
- 459 6 Lin, D. H. *et al.* Architecture of the symmetric core of the nuclear pore.  
460 *Science* **352**, aaf1015, doi:10.1126/science.aaf1015 (2016).
- 461 7 Mahamid, J. *et al.* Visualizing the molecular sociology at the HeLa cell  
462 nuclear periphery. *Science* **351**, 969-972, doi:10.1126/science.aad8857  
463 (2016).
- 464 8 Maimon, T., Elad, N., Dahan, I. & Medalia, O. The human nuclear pore  
465 complex as revealed by cryo-electron tomography. *Structure* **20**, 998-  
466 1006, doi:10.1016/j.str.2012.03.025 (2012).
- 467 9 Eibauer, M. *et al.* Structure and gating of the nuclear pore complex. *Nat*  
468 *Commun* **6**, 7532, doi:10.1038/ncomms8532 (2015).
- 469 10 Beck, M. *et al.* Nuclear pore complex structure and dynamics revealed by  
470 cryoelectron tomography. *Science* **306**, 1387-1390,  
471 doi:10.1126/science.1104808 (2004).
- 472 11 Yang, Q., Rout, M. P. & Akey, C. W. Three-dimensional architecture of the  
473 isolated yeast nuclear pore complex: functional and evolutionary  
474 implications. *Molecular cell* **1**, 223-234 (1998).
- 475 12 Rout, M. P. & Field, M. C. The Evolution of Organellar Coat Complexes and  
476 Organization of the Eukaryotic Cell. *Annu Rev Biochem*,  
477 doi:10.1146/annurev-biochem-061516-044643 (2017).
- 478 13 Berke, I. C., Boehmer, T., Blobel, G. & Schwartz, T. U. Structural and  
479 functional analysis of Nup133 domains reveals modular building blocks of  
480 the nuclear pore complex. *The Journal of cell biology* **167**, 591-597,  
481 doi:10.1083/jcb.200408109 (2004).
- 482 14 Rigort, A. *et al.* Focused ion beam micromachining of eukaryotic cells for  
483 cryoelectron tomography. *Proceedings of the National Academy of Sciences*  
484 *of the United States of America* **109**, 4449-4454,  
485 doi:10.1073/pnas.1201333109 (2012).
- 486 15 Marko, M., Hsieh, C., Schalek, R., Frank, J. & Mannella, C. Focused-ion-beam  
487 thinning of frozen-hydrated biological specimens for cryo-electron  
488 microscopy. *Nature methods* **4**, 215-217, doi:10.1038/nmeth1014 (2007).
- 489 16 Schaffer, M. *et al.* Optimized cryo-focused ion beam sample preparation  
490 aimed at in situ structural studies of membrane proteins. *Journal of*  
491 *structural biology* **197**, 73-82, doi:10.1016/j.jsb.2016.07.010 (2017).

- 492 17 Albert, S. *et al.* Proteasomes tether to two distinct sites at the nuclear pore  
493 complex *submitted* (2017).
- 494 18 Engel, B. D. *et al.* Native architecture of the Chlamydomonas chloroplast  
495 revealed by in situ cryo-electron tomography. *eLife* **4**,  
496 doi:10.7554/eLife.04889 (2015).
- 497 19 Freeman Rosenzweig, E. S. *et al.* The Eukaryotic CO<sub>2</sub>-Concentrating  
498 Organelle Is Liquid-like and Exhibits Dynamic Reorganization. *Cell* **171**,  
499 148-162 e119, doi:10.1016/j.cell.2017.08.008 (2017).
- 500 20 Pfeffer, S. *et al.* Dissecting the molecular organization of the translocon-  
501 associated protein complex. *Nat Commun* **8**, 14516,  
502 doi:10.1038/ncomms14516 (2017).
- 503 21 Engel, B. D. *et al.* In situ structural analysis of Golgi intracisternal protein  
504 arrays. *Proceedings of the National Academy of Sciences of the United*  
505 *States of America* **112**, 11264-11269, doi:10.1073/pnas.1515337112  
506 (2015).
- 507 22 Merchant, S. S. *et al.* The Chlamydomonas genome reveals the evolution of  
508 key animal and plant functions. *Science (New York, N.Y.)* **318**, 245-250,  
509 doi:10.1126/science.1143609 (2007).
- 510 23 Neumann, N., Lundin, D. & Poole, A. M. Comparative genomic evidence for  
511 a complete nuclear pore complex in the last eukaryotic common ancestor.  
512 *PLoS One* **5**, e13241, doi:10.1371/journal.pone.0013241 (2010).
- 513 24 Boruc, J., Zhou, X. & Meier, I. Dynamics of the plant nuclear envelope and  
514 nuclear pore. *Plant Physiol* **158**, 78-86, doi:10.1104/pp.111.185256  
515 (2012).
- 516 25 Tamura, K., Fukao, Y., Iwamoto, M., Haraguchi, T. & Hara-Nishimura, I.  
517 Identification and characterization of nuclear pore complex components  
518 in *Arabidopsis thaliana*. *Plant Cell* **22**, 4084-4097,  
519 doi:10.1105/tpc.110.079947 (2010).
- 520 26 Ciccarelli, F. D. *et al.* Complex genomic rearrangements lead to novel  
521 primate gene function. *Genome research* **15**, 343-351,  
522 doi:10.1101/gr.3266405 (2005).
- 523 27 von Appen, A. *et al.* In situ structural analysis of the human nuclear pore  
524 complex. *Nature* **526**, 140-143, doi:10.1038/nature15381 (2015).
- 525 28 Kelley, K., Knockenhauer, K. E., Kabachinski, G. & Schwartz, T. U. Atomic  
526 structure of the Y complex of the nuclear pore. *Nat Struct Mol Biol* **22**,  
527 425-431, doi:10.1038/nsmb.2998 (2015).
- 528 29 Gaik, M. *et al.* Structural basis for assembly and function of the Nup82  
529 complex in the nuclear pore scaffold. *The Journal of cell biology* **208**, 283-  
530 297, doi:10.1083/jcb.201411003 (2015).
- 531 30 Fernandez-Martinez, J. *et al.* Structure and Function of the Nuclear Pore  
532 Complex Cytoplasmic mRNA Export Platform. *Cell* **167**, 1215-1228 e1225,  
533 doi:10.1016/j.cell.2016.10.028 (2016).
- 534 31 Devos, D. *et al.* Components of coated vesicles and nuclear pore  
535 complexes share a common molecular architecture. *PLoS biology* **2**, e380,  
536 doi:10.1371/journal.pbio.0020380 (2004).
- 537 32 Fischer, J., Teimer, R., Amlacher, S., Kunze, R. & Hurt, E. Linker Nups  
538 connect the nuclear pore complex inner ring with the outer ring and  
539 transport channel. *Nat Struct Mol Biol* **22**, 774-781,  
540 doi:10.1038/nsmb.3084 (2015).

- 541 33 Alber, F. *et al.* The molecular architecture of the nuclear pore complex.  
542 *Nature* **450**, 695-701, doi:10.1038/nature06405 (2007).
- 543 34 Marsh, J. A. & Teichmann, S. A. Structure, dynamics, assembly, and  
544 evolution of protein complexes. *Annu Rev Biochem* **84**, 551-575,  
545 doi:10.1146/annurev-biochem-060614-034142 (2015).
- 546 35 Antonin, W., Ungricht, R. & Kutay, U. Traversing the NPC along the pore  
547 membrane: targeting of membrane proteins to the INM. *Nucleus* **2**, 87-91,  
548 doi:10.4161/nucl.2.2.14637 (2011).
- 549 36 Beck, M. & Baumeister, W. Cryo-Electron Tomography: Can it Reveal the  
550 Molecular Sociology of Cells in Atomic Detail? *Trends Cell Biol* **26**, 825-837,  
551 doi:10.1016/j.tcb.2016.08.006 (2016).
- 552 37 Shahin, V. *et al.* Steroids dilate nuclear pores imaged with atomic force  
553 microscopy. *Journal of cellular physiology* **202**, 591-601,  
554 doi:10.1002/jcp.20152 (2005).
- 555 38 Liashkovich, I., Meyring, A., Kramer, A. & Shahin, V. Exceptional structural  
556 and mechanical flexibility of the nuclear pore complex. *Journal of cellular*  
557 *physiology* **226**, 675-682, doi:10.1002/jcp.22382 (2011).
- 558 39 Schaffer, M. *et al.* Cryo-focused Ion Beam Sample Preparation for Imaging  
559 Vitreous Cells by Cryo-electron Tomography. *Bio Protoc* **5** (2015).
- 560 40 Hrabe, T. *et al.* PyTom: a python-based toolbox for localization of  
561 macromolecules in cryo-electron tomograms and subtomogram analysis.  
562 *Journal of structural biology* **178**, 177-188, doi:10.1016/j.jsb.2011.12.003  
563 (2012).
- 564 41 Beck, M., Lucic, V., Forster, F., Baumeister, W. & Medalia, O. Snapshots of  
565 nuclear pore complexes in action captured by cryo-electron tomography.  
566 *Nature* **449**, 611-615, doi:10.1038/nature06170 (2007).
- 567 42 Goodstein, D. M. *et al.* Phytozome: a comparative platform for green plant  
568 genomics. *Nucleic Acids Res* **40**, D1178-1186, doi:10.1093/nar/gkr944  
569 (2012).
- 570 43 Altschul, S. F. *et al.* Gapped BLAST and PSI-BLAST: a new generation of  
571 protein database search programs. *Nucleic Acids Res* **25**, 3389-3402  
572 (1997).
- 573 44 Soding, J., Biegert, A. & Lupas, A. N. The HHpred interactive server for  
574 protein homology detection and structure prediction. *Nucleic Acids Res* **33**,  
575 W244-248, doi:10.1093/nar/gki408 (2005).
- 576 45 Stuwe, T. *et al.* Nuclear pores. Architecture of the nuclear pore complex  
577 coat. *Science* **347**, 1148-1152, doi:10.1126/science.aaa4136 (2015).
- 578 46 Pettersen, E. F. *et al.* UCSF Chimera--a visualization system for exploratory  
579 research and analysis. *J Comput Chem* **25**, 1605-1612,  
580 doi:10.1002/jcc.20084 (2004).
- 581

582 **Figures**  
583

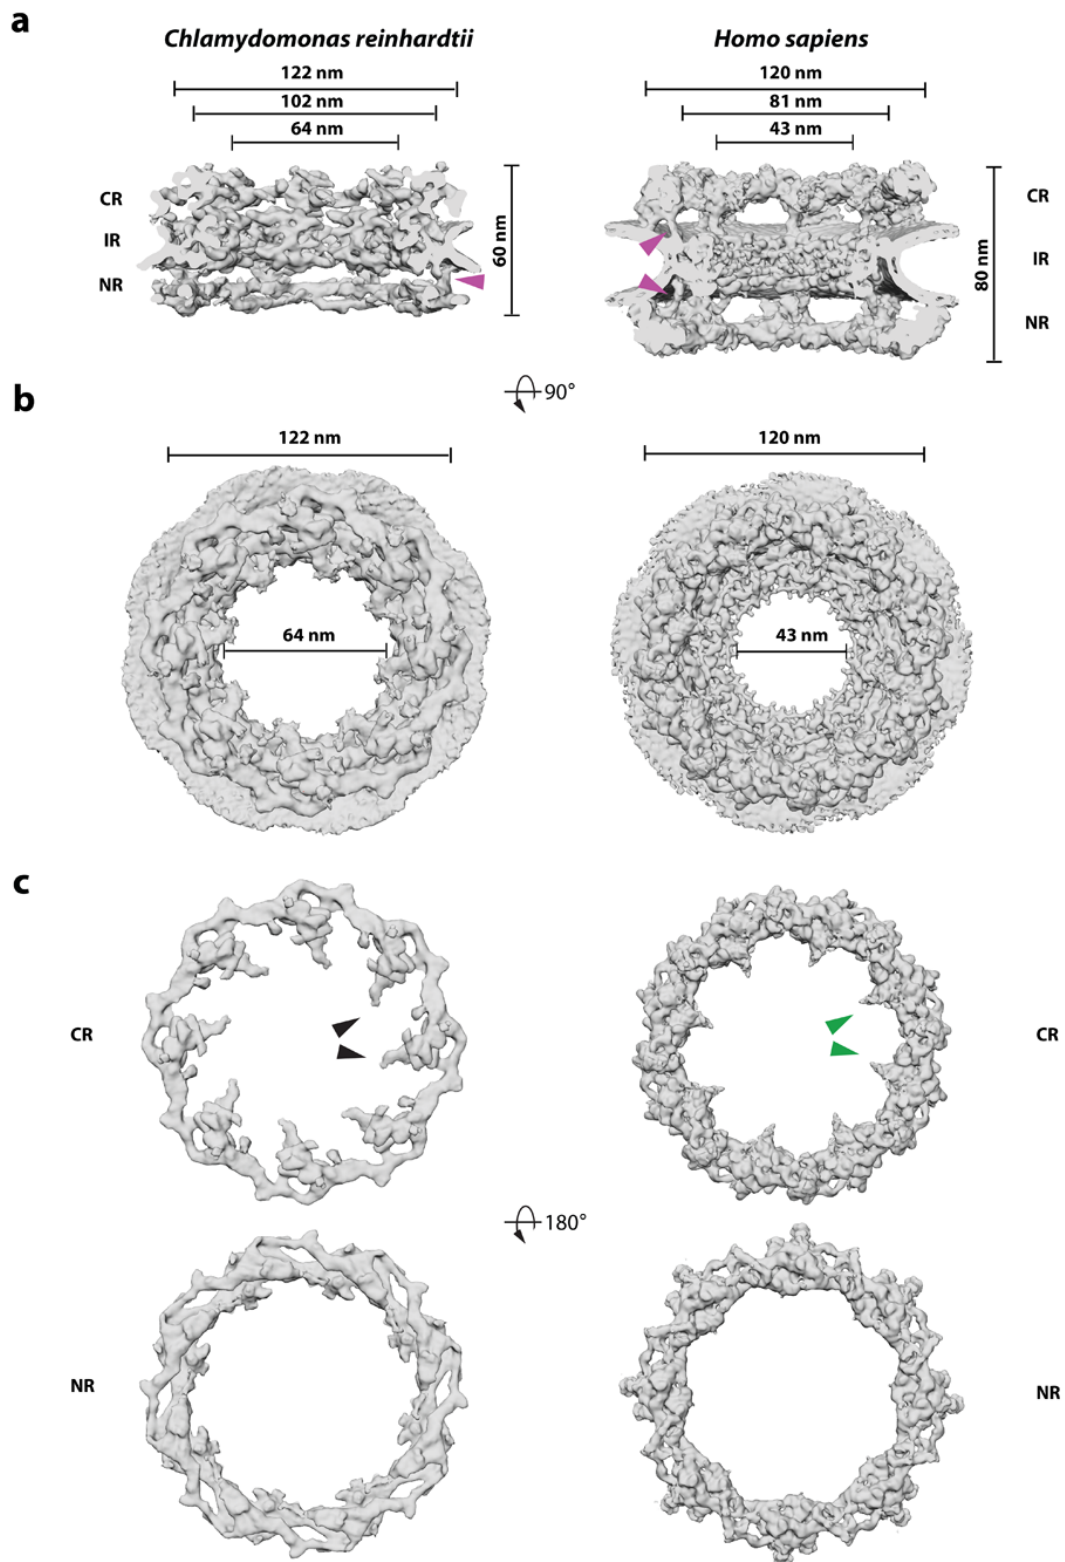

584  
585  
586  
587  
588  
589

**Figure 1. Structure of the *Cr*NPC in comparison to the *Hs*NPC. (a)** Structures are displayed as rendered isosurfaces, sliced through the central axis. Magenta arrowheads indicate the connector element, which is absent from the cytoplasmic side of the *Cr*NPC. **(b)** Cytoplasmic face view. The dilation of the

590 *CrNPC* central channel is apparent. **(c)** Cytoplasmic and nuclear rings of the  
591 *CrNPC* and *HsNPC*. Black and green arrowheads indicate the density assigned to  
592 the Nup159 (Nup214 in humans) subcomplex, which forms cytoplasmic  
593 filaments that protrude towards the central channel. Abbreviations: cytoplasmic  
594 ring (CR), inner ring (IR), nuclear ring (NR).  
595



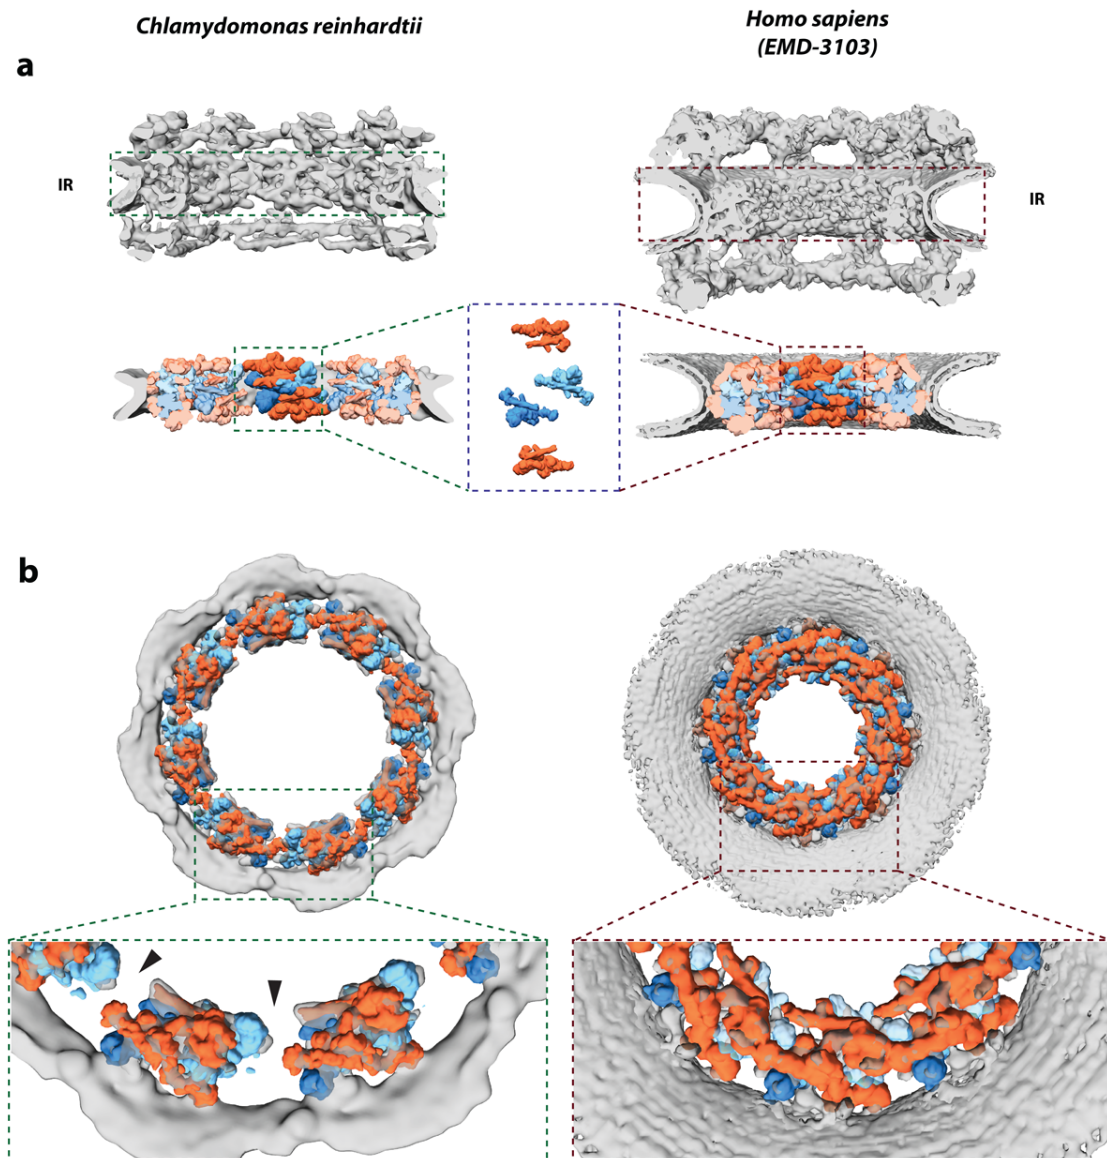

596  
597

598 **Figure 2. The inner ring of the CrNPC is dilated compared to the HsNPC. (a)**  
599 Structures of the CrNPC and the HsNPC, displayed as rendered isosurfaces, sliced  
600 through the central axis. The inner rings are indicated with dashed boxes (top).  
601 The four protomers of the asymmetric unit (orange: outer protomers, blue: inner  
602 protomers), each containing Nup93 and Nup62 subcomplexes, explain the inner  
603 ring densities of both the CrNPC (bottom left) and HsNPC (bottom right). **(b)**  
604 View of the CrNPC and HsNPC inner rings seen along the nucleocytoplasmic axis.  
605 It is evident that the asymmetric units (spokes) of the CrNPC inner ring are  
606 separated from each other (left), leaving rather large peripheral channels  
607 (arrowheads), whereas the asymmetric units of the HsNPC are positioned closer  
608 together (right).  
609

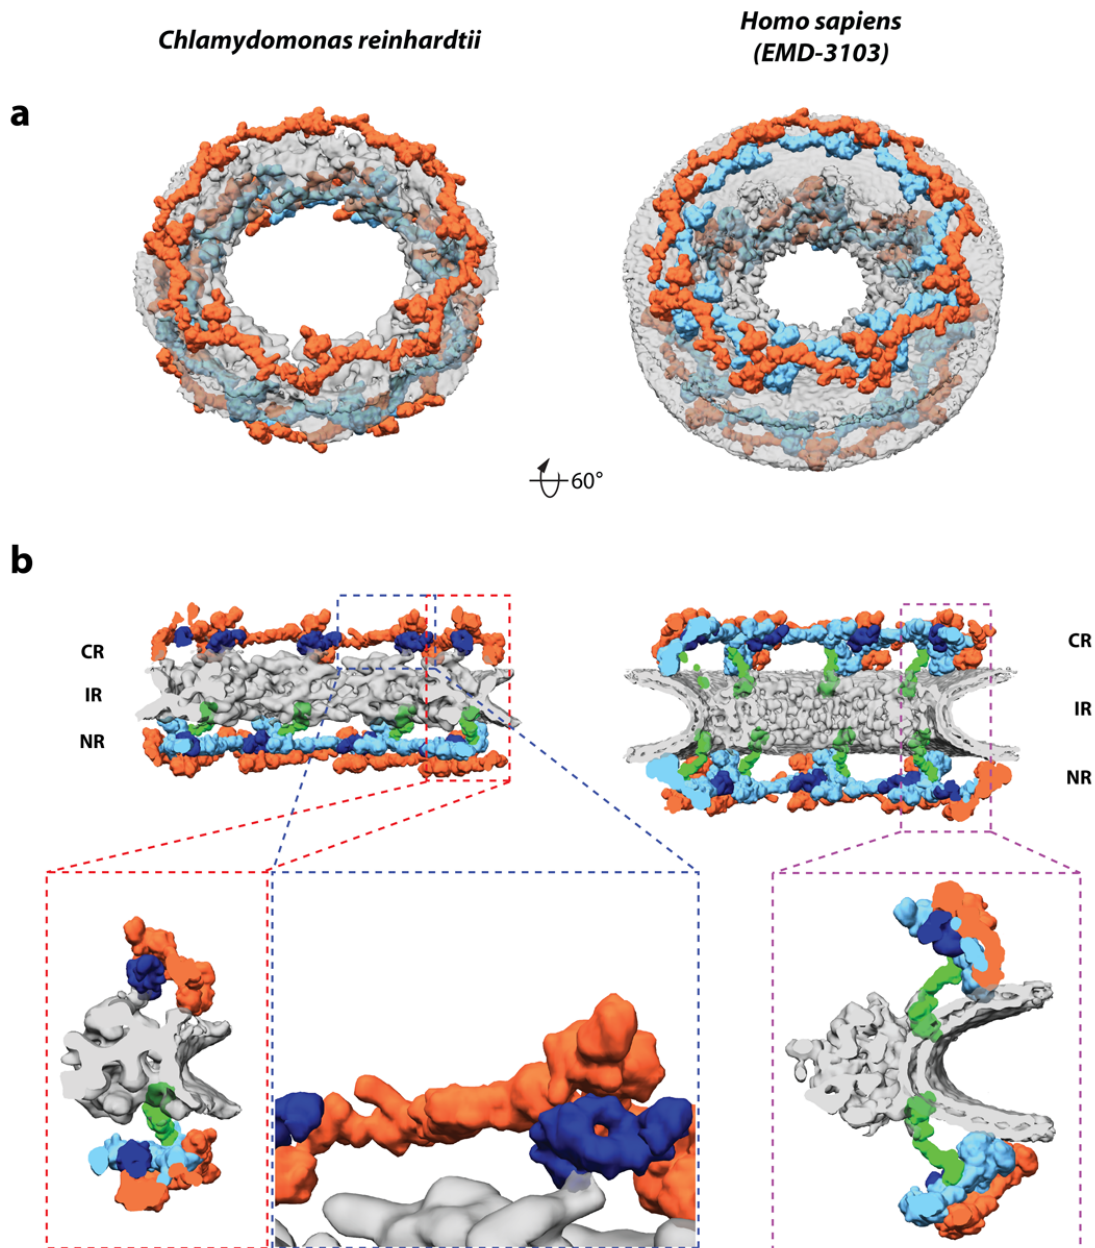

610

611 **Figure 3. The CrNPC has 24 Y-complexes.** (a) Segmented Y-complexes  
612 according to the fits presented in Supplementary Figs. 3 and 5 are shown  
613 superimposed with the inner ring structure (grey). The distribution of Y-  
614 complexes in the CrNPC is asymmetric across the nuclear envelope plane. The  
615 cytoplasmic ring has only 8 Y-complexes (orange), whereas the nuclear ring has  
616 16 (orange and light blue). In the HsNPC, the distribution is symmetric, with 16  
617 Y-complexes in both of the outer rings. (b) Rotated views of the CrNPC and  
618 HsNPC, sliced through the central axis and colored as in panel a. Density  
619 attributed to large scaffold Nups (Nup205/Nup188) in the outer rings of the  
620 HsNPC) (dark blue between the inner (bright blue) and outer (orange) Y-  
621 complex. Similar density is observed in the CrNPC, although this assignment  
622 remains tentative at the given resolution. The connector element is shown in  
623 green. Enlarged views on the bottom row show the presence of only one  
624 connector element in the CrNPC (red box) that is absent at the cytoplasmic ring  
625 of the CrNPC (blue box) and the presence of two connector elements and

626 duplicated Y-complexes in the *HsNPC* (purple box). Abbreviations: cytoplasmic  
627 ring (CR), inner ring (IR), nuclear ring (NR).
